# Supplementary material for: Synthesis, crystal structures, DNA interactions, and antitumor activity of two new dinuclear copper(ii) complexes with thiazole ligand
Source: Royal Society of Chemistry journal article supplement (doi:10.1039/d1ra05798g), 2021-01-01
Supplement: d1ra05798g1.pdf [file d1ra05798g1.pdf]

## Supporting Information

### Synthesis, crystal structures, DNA interactions, and antitumor activity of two new dinuclear copper(II) complexes with thiazole ligand

Zhenfang Zeng<sup>a</sup>, Jiehui Cai<sup>a</sup>, Qiuping Huang<sup>a</sup>, Yanying Weng<sup>a</sup>, Qiuchan Huang<sup>\*a</sup> and Youhuan Weia<sup>\*a</sup>

<sup>a</sup>School of Chemical and Biological Engineering, Guangxi Normal University for Nationalities, 23 Fozhi Road, Chongzuo 532200, PR China

\*Corresponding authors: huangqiuchan@163.com (Qiuchan Huang), weiyuhuan@gxnun.edu.cn (Youhuan Wei).

Telephone/Fax: 86-771-787-0799

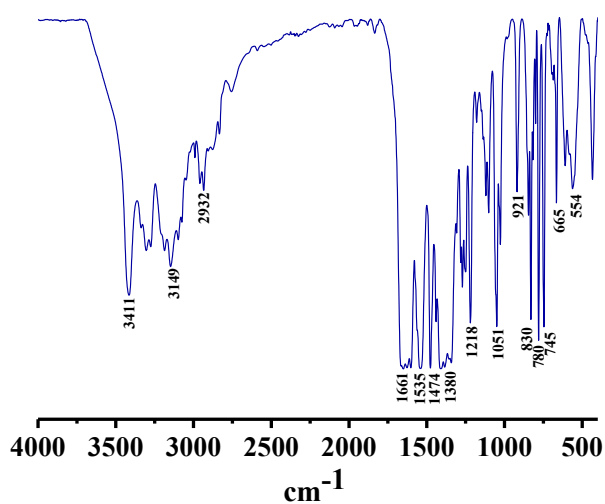

Fig. S1. IR spectrum of the complex 1.

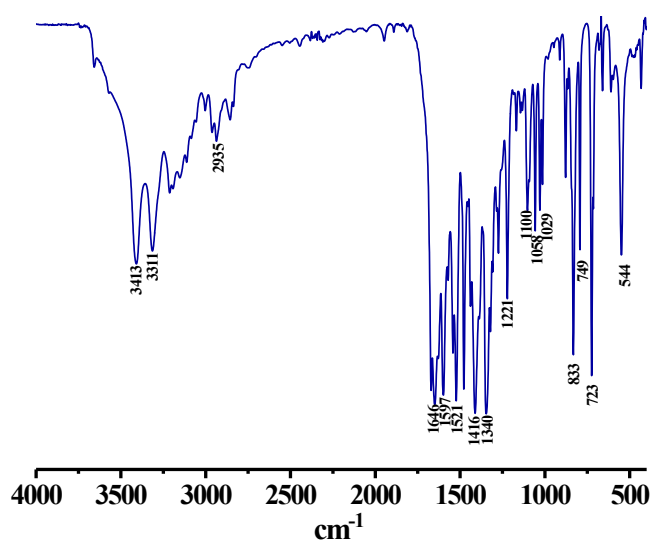

Fig. S2. IR spectrum of the complex 2.

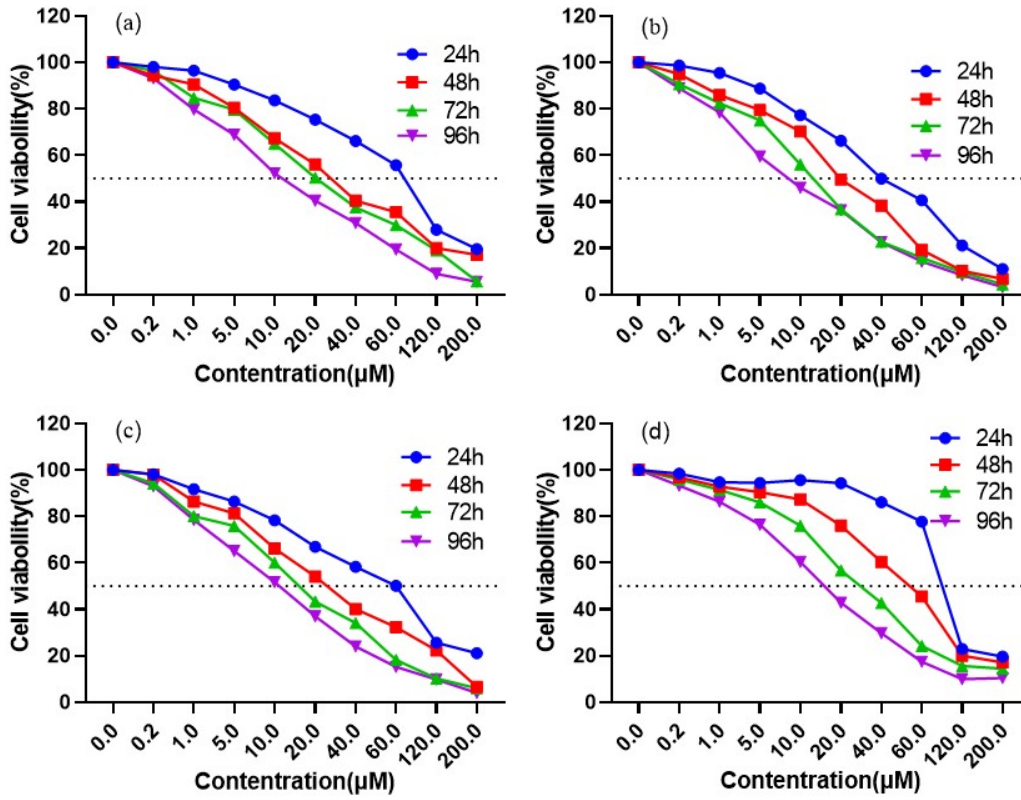

Fig. S3. Effects of  $[\text{Cu}(\text{ambt})_2(\text{cnba})_4]$  on cell viability and proliferation in cell lines A549 (a), HeLa (b), and HepG2 (c), LO2 (d).

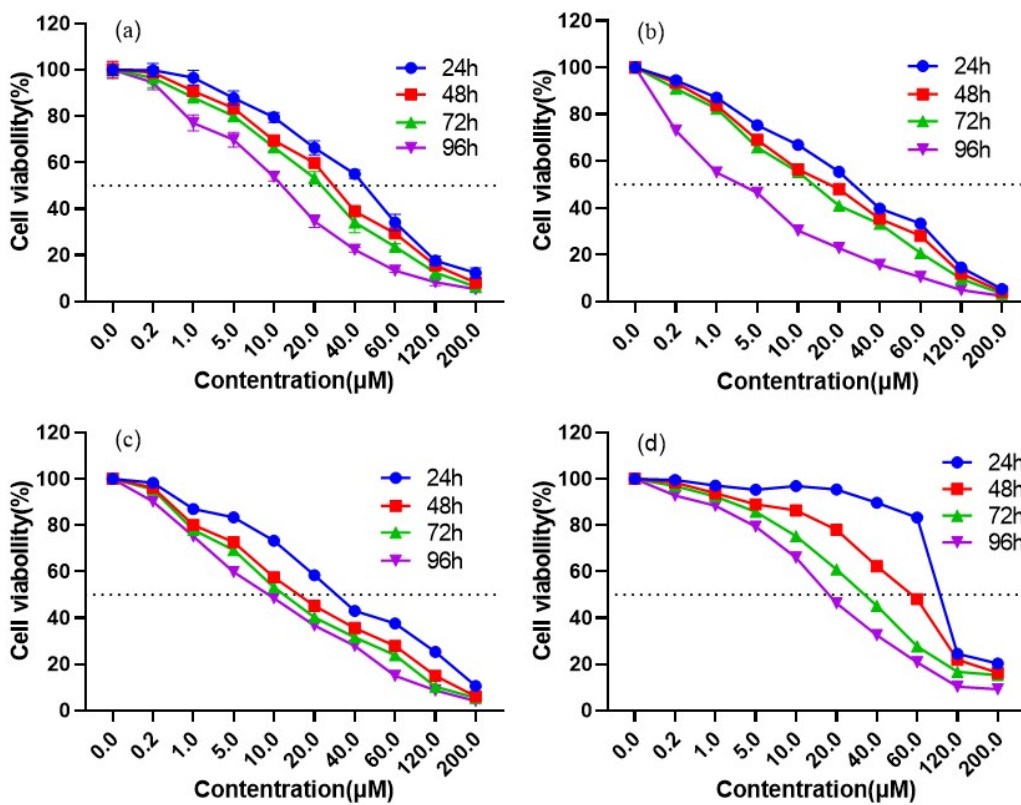

Fig. S4. Effects of  $[\text{Cu}(\text{ambt})_2(\text{clba})_4]$  on cell viability and proliferation in cell lines A549 (a), HeLa (b), and HepG2 (c), LO2 (d).

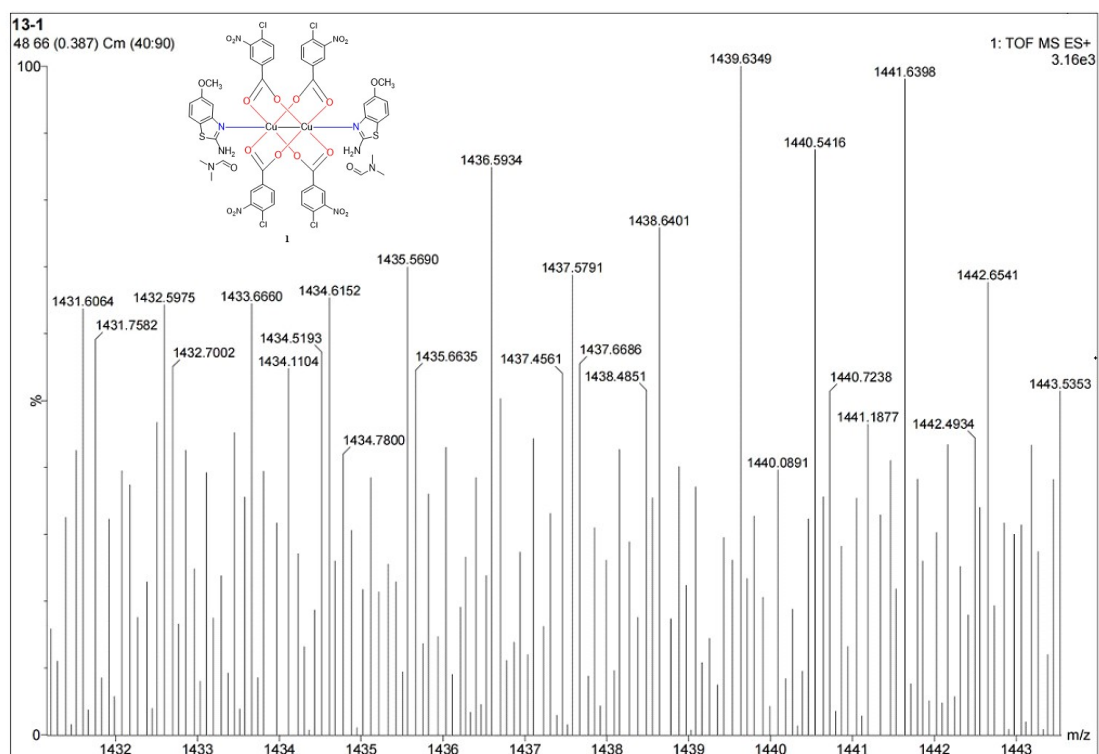

Fig. S5. ESI-MS spectrum of  $[\text{Cu}(\text{ambt})_2(\text{cnba})_4]$ .

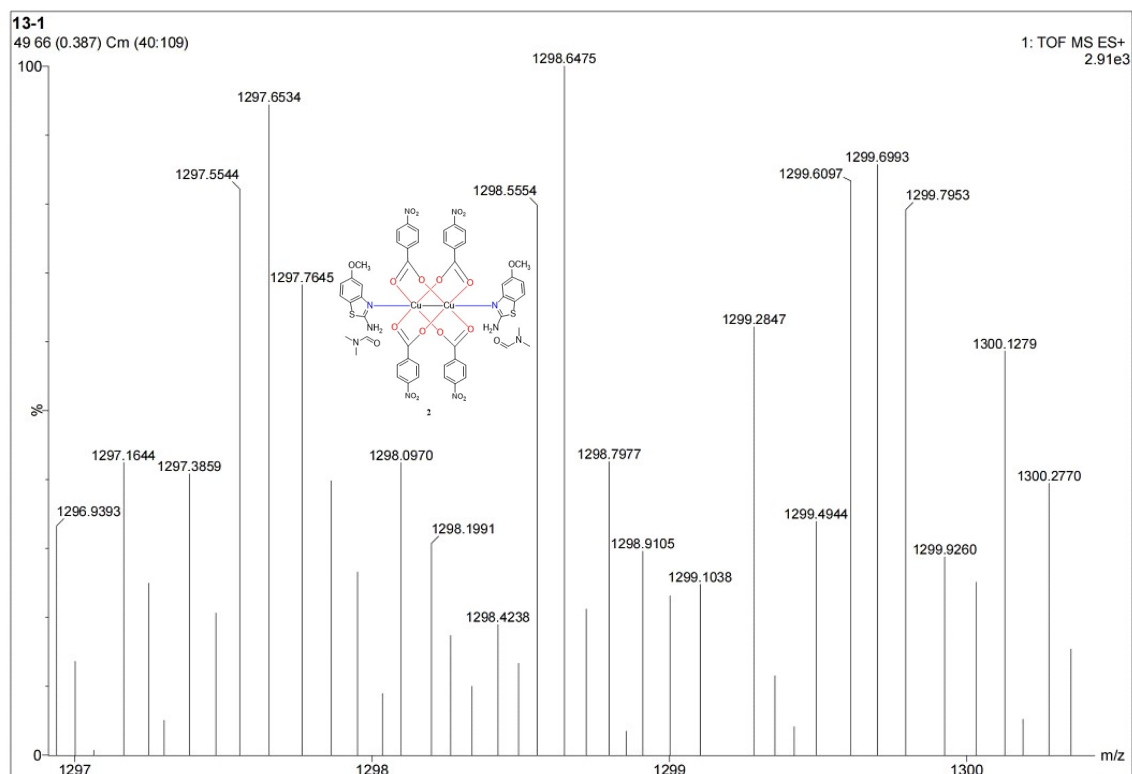

Fig. S6. ESI-MS spectrum of  $[\text{Cu}(\text{ambt})_2(\text{clba})_4]$ .

Table S1. Bond lengths and bond angles parameters for  $[\text{Cu}(\text{ambt})_2(\text{cnba})_4]$  and  $[\text{Cu}(\text{ambt})_2(\text{clba})_4]$ .

Bond length (Å)

| [Cu(ambt) <sub>2</sub> (cnba) <sub>4</sub> ] |            | [Cu(ambt) <sub>2</sub> (clba) <sub>4</sub> ] |            |
|----------------------------------------------|------------|----------------------------------------------|------------|
| Cu(1)-O(1)                                   | 1.9640(13) | Cu(1)-O(3)#1                                 | 1.956(2)   |
| Cu(1)-O(4)#1                                 | 1.9850(13) | Cu(1)-O(4)#1                                 | 1.971(2)   |
| Cu(1)-N(1)                                   | 2.1453(17) | Cu(1)-N(1)                                   | 2.163(2)   |
| O(3)-Cu(1)#1                                 | 1.9873(13) | O(3)-Cu(1)#1                                 | 1.9558(19) |
| Cu(1)-O(2)                                   | 1.9713(13) | Cu(1)-O(2)                                   | 1.9723(19) |
| Cu(1)-O(3)#1                                 | 1.9873(13) | Cu(1)-O(1)                                   | 1.989(2)   |
| Cu(1)-Cu(1)#1                                | 2.7290(4)  | Cu(1)-Cu(1)#1                                | 2.6970(6)  |
| O(4)-Cu(1)#1                                 | 1.9850(13) | O(4)-Cu(1)#1                                 | 1.971(2)   |

Bond angle (°)

| [Cu(ambt) <sub>2</sub> (cnba) <sub>4</sub> ] |            | [Cu(ambt) <sub>2</sub> (clba) <sub>4</sub> ] |            |
|----------------------------------------------|------------|----------------------------------------------|------------|
| O(1)-Cu(1)-O(2)                              | 88.33(6)   | O(3)#1-Cu(1)-O(2)                            | 166.78(8)  |
| O(1)-Cu(1)-O(4)#1                            | 89.71(6)   | O(3)#1-Cu(1)-O(4)#1                          | 88.86(9)   |
| O(2)-Cu(1)-O(4)#1                            | 165.95(6)  | O(2)-Cu(1)-O(4)#1                            | 88.53(9)   |
| O(1)-Cu(1)-O(3)#1                            | 165.99(6)  | O(3)#1-Cu(1)-O(1)                            | 89.46(8)   |
| O(2)-Cu(1)-O(3)#1                            | 90.00(6)   | O(2)-Cu(1)-O(1)                              | 90.14(8)   |
| O(4)#1-Cu(1)-O(3)#1                          | 88.54(6)   | O(4)#1-Cu(1)-O(1)                            | 166.84(8)  |
| O(1)-Cu(1)-N(1)                              | 97.71(6)   | O(3)#1-Cu(1)-N(1)                            | 100.11(9)  |
| O(2)-Cu(1)-N(1)                              | 99.21(6)   | O(2)-Cu(1)-N(1)                              | 93.09(9)   |
| O(4)#1-Cu(1)-N(1)                            | 94.84(6)   | O(4)#1-Cu(1)-N(1)                            | 98.46(9)   |
| O(3)#1-Cu(1)-N(1)                            | 96.28(6)   | O(1)-Cu(1)-N(1)                              | 94.69(9)   |
| O(1)-Cu(1)-Cu(1)#1                           | 84.85(4)   | O(3)#1-Cu(1)-Cu(1)#1                         | 85.78(6)   |
| O(2)-Cu(1)-Cu(1)#1                           | 87.53(4)   | O(2)-Cu(1)-Cu(1)#1                           | 81.09(6)   |
| O(4)#1-Cu(1)-Cu(1)#1                         | 78.44(4)   | O(4)#1-Cu(1)-Cu(1)#1                         | 85.33(6)   |
| O(3)#1-Cu(1)-Cu(1)#1                         | 81.18(4)   | O(1)-Cu(1)-Cu(1)#1                           | 81.52(6)   |
| N(1)-Cu(1)-Cu(1)#1                           | 172.83(4)  | N(1)-Cu(1)-Cu(1)#1                           | 173.01(6)  |
| C(14)-O(1)-Cu(1)                             | 122.27(13) | C(14)-O(1)-Cu(1)                             | 125.41(18) |
| C(7)-O(2)-Cu(1)                              | 118.38(12) | C(7)-O(2)-Cu(1)                              | 125.71(18) |
| C(14)-O(3)-Cu(1)#1                           | 125.30(13) | C(7)-O(3)-Cu(1)#1                            | 120.76(18) |
| C(7)-O(4)-Cu(1)#1                            | 128.64(12) | C(14)-O(4)-Cu(1)#1                           | 121.72(18) |
| C(15)-N(1)-Cu(1)                             | 122.66(14) | C(15)-N(1)-Cu(1)                             | 122.83(19) |
| C(16)-N(1)-Cu(1)                             | 126.52(13) | C(16)-N(1)-Cu(1)                             | 124.41(18) |
